# Supplementary material for: UV Dose Governs UV-Polymerized Polyacrylamide Hydrogel Modulus
Source: Hindawi journal article supplement (doi:10.1155/2017/5147482), 2017-01-01
Supplement: f1 [file 5147482.f1.pdf]

## Supplemental Data

**Table S1.** UV intensities and exposure times used to achieve each UV dose (i.e. total energy) for A8-B.10 and A12-B.25 gel compositions as well as their resultant Young's moduli.

| Gel Composition | UV Intensity (mW/cm <sup>2</sup> ) | Exposure Time (s) | Dose (mJ/cm <sup>2</sup> ) | E (kPa)       |
|-----------------|------------------------------------|-------------------|----------------------------|---------------|
| A8-B.10         | 26.411                             | 43                | <b>1.14</b>                | 0.08 ± 0.03   |
|                 |                                    | 57                | <b>1.51</b>                | 0.38 ± 0.32   |
|                 |                                    | 71                | <b>1.88</b>                | 1.14 ± 0.48   |
|                 |                                    | 172               | <b>4.54</b>                | 2.96 ± 0.75   |
|                 |                                    | 300               | <b>7.92</b>                | 3.14 ± 0.73   |
|                 |                                    | 757               | <b>19.99</b>               | 2.70 ± 0.69   |
|                 |                                    | 1493              | <b>39.43</b>               | 3.00 ± 0.73   |
| A12-B.25        | 15.112                             | 50                | <b>0.76</b>                | 2.34 ± 0.27   |
|                 |                                    | 75                | <b>1.13</b>                | 11.79 ± 1.29  |
|                 |                                    | 100               | <b>1.51</b>                | 41.24 ± 2.71  |
|                 |                                    | 125               | <b>1.89</b>                | 71.37 ± 4.59  |
|                 |                                    | 300               | <b>4.53</b>                | 80.80 ± 0.98  |
|                 |                                    | 524               | <b>7.92</b>                | 87.73 ± 4.73  |
|                 |                                    | 1324              | <b>20.01</b>               | 87.63 ± 3.50  |
|                 |                                    | 2609              | <b>39.43</b>               | 93.80 ± 0.27  |
| A12-B.25        | 26.411                             | 43                | <b>1.14</b>                | 15.27 ± 19.36 |
|                 |                                    | 57                | <b>1.51</b>                | 37.65 ± 35.26 |
|                 |                                    | 71                | <b>1.88</b>                | 54.98 ± 12.04 |
|                 |                                    | 172               | <b>4.54</b>                | 82.39 ± 7.21  |
|                 |                                    | 300               | <b>7.92</b>                | 85.22 ± 4.43  |
|                 |                                    | 757               | <b>19.99</b>               | 81.86 ± 6.10  |
|                 |                                    | 1493              | <b>39.43</b>               | 82.84 ± 8.60  |
| A12-B.25        | 66.701                             | 28                | <b>1.87</b>                | 1.07 ± 0.47   |
|                 |                                    | 68                | <b>4.54</b>                | 69.11 ± 0.69  |
|                 |                                    | 119               | <b>7.94</b>                | 75.27 ± 7.28  |
|                 |                                    | 300               | <b>20.01</b>               | 74.37 ± 3.89  |
|                 |                                    | 591               | <b>39.42</b>               | 74.12 ± 0.78  |

**Table 2:** Comparison of Young's moduli for UV and AP/TEMED-polymerized PAA gels. A8-B.10 and A12-B.25 UV-polymerized gels were prepared with 0.01% Irgacure at 15 mW/cm<sup>2</sup> intensity and 500 s exposure time.

| <b>Gel type</b> | <b>UV gel Young's modulus <math>\pm</math> SD (kPa)</b> | <b>TEMED gel Young's modulus <math>\pm</math> SD (kPa)</b> | <b>Statistically different?</b> |
|-----------------|---------------------------------------------------------|------------------------------------------------------------|---------------------------------|
| <b>A8-B.10</b>  | 11.32 $\pm$ 0.46                                        | 9.82 $\pm$ 1.75                                            | No                              |
| <b>A12-B.25</b> | 100.4 $\pm$ 11.3                                        | 112.3 $\pm$ 8.0                                            | No                              |
